# Supplementary material
Source: PubMed Central journal article supplement (PMC8207242)
Supplement: jama-e217665-s004.pdf [file jama-e217665-s004.pdf]

Winner PK, McAllister P, Chakhava G, et al. Effects of intravenous eptinezumab vs placebo on headache pain and most bothersome symptom when initiated during a migraine attack: a randomized clinical trial. *JAMA*. Published June 15, 2021. doi:10.1001/jama.2021.7665

## Data Sharing Statement

### Data

**Data available:** Yes

**Data types:** Deidentified participant data

**How to access data:** <https://www.lundbeck.com/trials>

**When available:** With publication

### Supporting Documents

**Document types:** None

### Additional Information

**Who can access the data:** Researchers whose proposed use of the data has been approved, through application submitted to <https://www.lundbeck.com/trials>

**Types of analyses:** Specified purposes only

**Mechanisms of data availability:** With approved proposal and a signed data access agreement

**Any additional restrictions:** N/A
